# Supplementary material for: Cost-Effectiveness Analysis of Direct-Acting Antiviral Agents for Occupational Hepatitis C Infections in Germany
Source: Int J Environ Res Public Health. 2020 Jan 9;17(2):440. doi: 10.3390/ijerph17020440 (PMC7013637; doi:10.3390/ijerph17020440)
Supplement: Supplementary file 1 [file ijerph-17-00440-s001.zip]

Archive with 5 entries (5 files):
- CHEERS checklist_CEA occupational HCV.pdf
- DAA Cost Calculation.png
- DAA Result Calculation.png
- Triple Cost Calculation.png
- Triple Result Calculation.png
